# Supplementary material for: Characterization of Yeasts Isolated from Parmigiano Reggiano Cheese Natural Whey Starter: From Spoilage Agents to Potential Cell Factories for Whey Valorization
Source: MDPI journal article supplement (doi:10.3390/microorganisms9112288), 2021-11-03
Supplement: s1 [file s1]

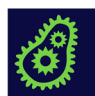

## Article

# Characterization of Yeasts Isolated from Parmigiano Reggiano Cheese Natural Whey Starter: From Spoilage Agents to Potential Cell Factories for Whey Valorization

Serena Martini <sup>1</sup>, Mattia Bonazzi <sup>1</sup>, Ilaria Malorgio <sup>1</sup>, Valentina Pizzamiglio <sup>2</sup>, Davide Tagliazucchi <sup>1</sup>, Lisa Solieri <sup>12,\*</sup>

<sup>1</sup> Department of Life Sciences, University of Modena and Reggio Emilia, Via Amendola, 2 - Pad. Besta, 42122 Reggio Emilia, Italy; serena.martini@unimore.it (S.M.); 240824@studenti.unimore.it (M.B.); malorgioilaria.94@gmail.com (I.M.); davide.tagliazucchi@unimore.it (D.T.)

<sup>2</sup> Consorzio del Formaggio Parmigiano Reggiano, via J.F. Kennedy 18, 42124, Reggio Emilia, Italy; pizzamiglio@parmigianoreggiano.it

\* Correspondence: lisa.solieri@unimore.it; Tel.: +39 0522 522026

**Abstract:** Whey is the main by-product of the dairy industry and contains sugars (lactose) and proteins (especially serum proteins and, at lesser extent, residual caseins), which can be valorized by the fermentative action of yeasts. In the present study, we characterized the spoilage yeast population inhabiting natural whey starter (NWS), the undefined starter culture of thermophilic lactic acid bacteria used in Parmigiano Reggiano (PR) cheesemaking, and evaluated thermotolerance, mating type, and the aptitude to produce ethanol and bioactive peptides from whey lactose and proteins, respectively, in a selected pool of strains. PCR-RFLP assay of ribosomal ITS regions and phylogenetic analysis of 26S rDNA D1/D2 domains showed that PR NWS yeast population consists of the well-documented *Kluyveromyces marxianus*, as well as of other species

(*Saccharomyces cerevisiae*, *Wickerhamiella pararugosa*, and *Torulaspora delbrueckii*), with multiple biotypes scored within each species as demonstrated by (GTG)<sub>5</sub>-based MSP-PCR. Haploid and diploid *K. marxianus* strains were identified through *MAT* genotyping, while thermotolerance assay allowed the selection of strains suitable to grow up to 48 °C. In whey fermentation trials, one thermotolerant strain was suitable to release ethanol with a fermentation efficiency of 86.5%, while another candidate was able to produce the highest amounts of both ethanol and bioactive peptides with potentially anti-hypertensive function. The present work demonstrated that PR NWS is a reservoir of ethanol and bioactive peptides producer yeasts, which can be exploited to valorize whey, in agreement with the principles of circularity and sustainability.

**Keywords:** Parmigiano Reggiano cheese; whey; natural whey starter; ethanol; bioactive peptide; yeasts; *Kluyveromyces marxianus*; *Wickerhamiella pararugosa*; *Torulaspora delbrueckii*

**Citation:** Martini, S.; Bonazzi, M.; Malorgio, I.; Pizzamiglio, V.; Tagliazucchi, D.; Solieri, L. Characterization of Yeasts Isolated from Parmigiano Reggiano Cheese Natural Whey Starter: From Spoilage Agents to Potential Cell Factories for Whey Valorization. *Microorganisms* **2021**, *9*, 2288. <https://doi.org/10.3390/microorganisms9112288>

Academic Editor: Salam A. Ibrahim

Received: 10 September 2021

Accepted: 29 October 2021

Published: 3 November 2021

**Publisher's Note:** MDPI stays neutral with regard to jurisdictional claims in published maps and institutional affiliations.

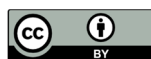

**Copyright:** © 2021 by the authors. Licensee MDPI, Basel, Switzerland. This article is an open access article distributed under the terms and conditions of the Creative Commons Attribution (CC BY) license (<https://creativecommons.org/licenses/by/4.0/>).

## Supplementary Data

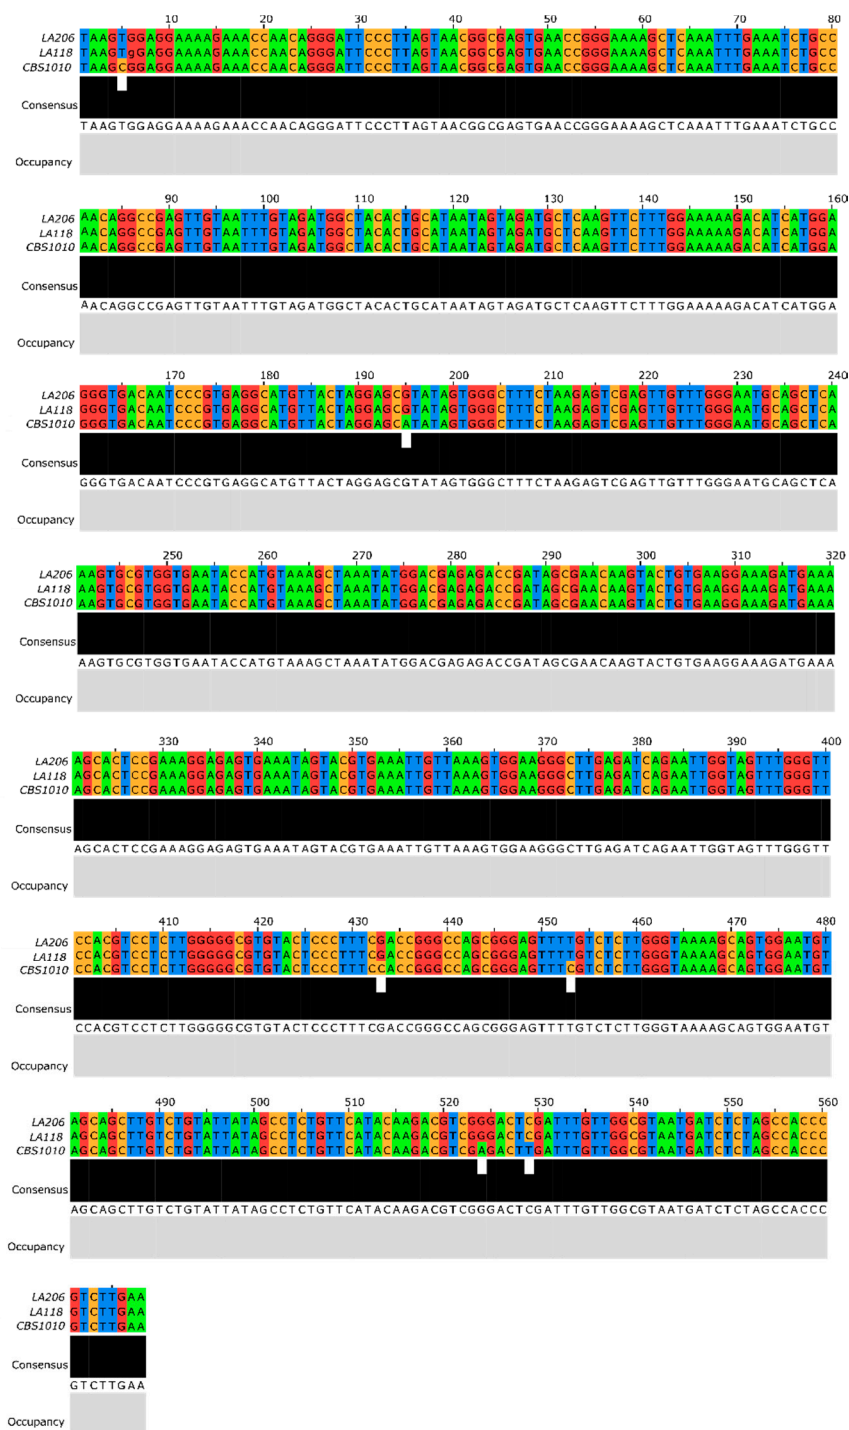

**Figure S1.** Multiple sequence alignment of 26S rRNA D1/D2 domain nucleotide sequences of *W. pararugosa* LA118 and LA206 with reference strain CBS1010<sup>T</sup>. Nucleotide sequences were aligned using Muscle program [39] in MEGA X software [40] and the resulting alignment was visualized using JalView v2.11 [64].

**Table S1.** Kinetic growth parameters of selected 12 *K. marxianus* strains, 2 *W. pararugosa* and 1 *T. delbrueckii* strain. Growth data obtained by gravimetric assays in whey were fitted with different mathematical models in Grofit [50] to calculate growth rate  $\mu$  ( $\text{h}^{-1}$ ), growth efficiency A (maximum % of  $\text{CO}_2$  released), and lag phase (h). When available, for each strains MAT genotype and temperature score are reported. Data are represented as mean ( $n=3$ )  $\pm$  standard deviation. Abbreviations: T, temperature; Km, *K. marxianus*; Wp, *W. pararugosa*; Td, *T. delbrueckii*; nd, not detected.

| Species | Strains | Mating type       | T score | Growth parameters |                     |                     |                        |
|---------|---------|-------------------|---------|-------------------|---------------------|---------------------|------------------------|
|         |         |                   |         | Model             | $\mu$               | A                   | $\lambda$              |
| Km      | CA104   | MATa/MAT $\alpha$ | 13      | Richards          | 0.0206 $\pm$ 0.0009 | 2.3614 $\pm$ 0.0460 | 25.1589 $\pm$ 1.7176   |
|         | CA105   | MAT $\alpha$      | 13      | Richards          | 0.0192 $\pm$ 0.0009 | 2.1657 $\pm$ 0.3203 | 67.7658 $\pm$ 3.6328   |
|         | CA111   | MATa/MAT $\alpha$ | 13      | Gompertz          | 0.0233 $\pm$ 0.0047 | 2.6124 $\pm$ 0.2264 | 15.10322.3275          |
|         | CA116   | MATa/MAT $\alpha$ | 15      | Richards          | 0.0170 $\pm$ 0.0002 | 1.9749 $\pm$ 0.6838 | 69.2531 $\pm$ 7.3062   |
|         | CA204   | MATa/MAT $\alpha$ | 16      | Richards          | 0.0197 $\pm$ 0.0009 | 2.0128 $\pm$ 0.4480 | 31.8511 $\pm$ 2.2288   |
|         | CA207   | MATa/MAT $\alpha$ | 9       | logistics         | 0.0230 $\pm$ 0.0004 | 1.7240 $\pm$ 0.1685 | 45.4162 $\pm$ 10.7960  |
|         | CA213   | MATa/MAT $\alpha$ | 12      | Richards          | 0.0241 $\pm$ 0.0006 | 2.3682 $\pm$ 0.3023 | 30.8106 $\pm$ 9.0832   |
|         | CA214   | MATa/MAT $\alpha$ | 12      | logistics         | 0.0222 $\pm$ 0.0018 | 2.0853 $\pm$ 0.4113 | 35.1206 $\pm$ 12.0657  |
|         | LA102   | MAT $\alpha$      | 12      | Gompertz          | 0.0241 $\pm$ 0.0011 | 2.2359 $\pm$ 0.3692 | 19.0651 $\pm$ 2.5031   |
|         | LA202   | MAT $\alpha$      | 15      | logistics         | 0.0219 $\pm$ 0.0019 | 2.2831 $\pm$ 0.0103 | 78.8519 $\pm$ 11.8921  |
|         | LA210   | MAT $\alpha$      | 12      | Gompertz          | 0.0218 $\pm$ 0.0008 | 2.5022 $\pm$ 0.3536 | 21.2292 $\pm$ 6.1693   |
|         | RO101   | MATa              | 12      | Richards          | 0.0215 $\pm$ 0.0022 | 2.0656 $\pm$ 0.2168 | 43.9611 $\pm$ 1.8880   |
| Wp      | LA118   | nd                | nd      | Gompertz          | 0.0077 $\pm$ 0.0000 | 0.1493 $\pm$ 0.0000 | 3.434038 $\pm$ 0.0000  |
|         | LA218   | nd                | nd      | modified Gompertz | 0.007 $\pm$ 0.00004 | 0.4814 $\pm$ 0.0000 | 10.67506 $\pm$ 0.0000  |
| Td      | RO204-3 | nd                | nd      | Gompertz          | 0.0040 $\pm$ 0.0021 | 2.8294 $\pm$ 0.3888 | 326.5984 $\pm$ 10.8513 |

**Table S2.**  $\beta$ -casein-derived peptides identified after whey fermentation by selected yeast strains. Details on strain isolation are in Table 2.

| Peptide sequence | Fragment | <i>m/z</i> observed | <i>m/z</i> expected | ppm  | Charge  | CA105 | CA116 | CA214 | LA202 | RO101 | RO204-3 |
|------------------|----------|---------------------|---------------------|------|---------|-------|-------|-------|-------|-------|---------|
| PGEIVE           | 9-14     | 643.3300            | 643.3297            | -0.5 | 1       |       |       | X     |       | X     |         |
| SLSssEESITR      | 15-25    | 678.2598            | 678.2600            | 0.3  | 2       |       |       | X     | X     |       |         |
| SLsssEESITR      | 15-25    | 718.2449            | 718.2432            | -2.4 | 2       | X     | X     | X     | X     | X     |         |
| sLsssEESITR      | 15-25    | 758.2262            | 758.2263            | 0.1  | 2       |       |       | X     | X     | X     |         |
| SLSssEESITRINK   | 15-28    | 570.9159            | 570.9164            | 0.9  | 3       |       |       | X     |       | X     |         |
| SLsssEESITRINK   | 15-28    | 895.8542            | 895.8542            | 0.0  | 2 and 3 | X     | X     | X     |       | X     | X       |
| sLsssEESITRINK   | 15-28    | 935.8392            | 935.8373            | -2.0 | 2       | X     | X     | X     | X     | X     | X       |
| SLsssEESITRINKK  | 15-29    | 640.2699            | 640.2702            | 0.5  | 3       |       |       |       |       | X     |         |
| sLsssEESITRINKK  | 15-29    | 999.8848            | 999.8848            | 0.0  | 2       |       |       |       |       |       | X       |
| sssEESITRINK     | 17-28    | 795.7975            | 795.7961            | -1.8 | 2       |       |       |       |       | X     |         |
| KKIEKFQsE        | 28-36    | 608.8021            | 608.8023            | 0.3  | 2       |       | X     |       |       | X     |         |
| KIEKFQsEE        | 29-37    | 609.2757            | 609.2761            | 0.7  | 2       |       |       |       |       | X     |         |
| DELQ             | 43-46    | 504.2277            | 504.2300            | 4.6  | 1       |       |       |       |       | X     |         |
| ELQ              | 44-46    | 389.2014            | 389.2031            | 4.4  | 1       |       |       |       |       | X     |         |
| AQTQSLVYFPFGPIPN | 53-68    | 864.9530            | 864.9514            | -1.8 | 1       | X     |       |       |       |       |         |
| SLVYFPFGP        | 57-65    | 976.5151            | 976.5138            | -1.3 | 1 and 2 |       |       | X     |       | X     |         |
| SLVYFPFGPI       | 57-66    | 545.3047            | 545.3026            | -3.9 | 2       | X     |       |       |       |       |         |
| SLVYFPFGPIPN     | 57-68    | 1300.6944           | 1300.6936           | -0.6 | 1       | X     |       |       |       |       |         |
| VYFPFGPIPN       | 59-68    | 1100.5787           | 1100.5775           | -1.1 | 1       | X     | X     |       | X     | X     |         |
| SLPQ             | 69-72    | 444.2446            | 444.2453            | 1.6  | 1       |       |       | X     |       |       |         |
| NIPPLTQTPVVVPP   | 73-86    | 736.4298            | 736.4296            | -0.3 | 2       |       |       |       |       | X     |         |
| NIPPLTQTPVVVPPF  | 73-87    | 809.9645            | 809.9638            | -0.9 | 2       | X     |       |       |       |       |         |
| IPPL             | 74-77    | 439.2925            | 439.2915            | -2.3 | 1       | X     |       |       |       |       |         |
| PPL              | 75-77    | 326.2076            | 326.2074            | -0.6 | 1       |       | X     |       |       |       |         |
| PPLTQTPV         | 75-82    | 852.4809            | 852.4825            | 1.9  | 1       |       |       |       | X     |       |         |
| PPLTQTPVVVPP     | 75-86    | 622.8670            | 622.8661            | -1.4 | 2       |       |       | X     |       | X     |         |
| PPLTQTPVVVPPF    | 75-87    | 696.4004            | 696.4003            | -0.1 | 2       | X     |       |       |       |       |         |
| PVVVPP           | 81-86    | 607.3817            | 607.3814            | -0.5 | 1       | X     | X     | X     |       | X     |         |

|                           |         |           |           |      |         |   |   |   |   |   |   |
|---------------------------|---------|-----------|-----------|------|---------|---|---|---|---|---|---|
| PVVVPPF                   | 81-87   | 754.4492  | 754.4498  | 0.8  | 1 and 2 | X | X | X | X | X | X |
| PVVVPPFLQP                | 81-90   | 1092.6431 | 1092.6452 | 1.9  | 1 and 2 | X |   |   |   |   |   |
| VVPP                      | 83-86   | 411.2597  | 411.2602  | 1.2  | 1       |   |   | X |   |   |   |
| VMGVSK                    | 92-97   | 310.6752  | 310.6754  | 0.6  | 2       |   |   | X |   | X | X |
| VSKVKEA                   | 95-101  | 380.7317  | 380.7318  | 0.3  | 2       |   |   |   | X |   |   |
| EAMAPK                    | 100-105 | 646.3225  | 646.3229  | 0.6  | 1       |   |   | X |   |   |   |
| AMAPK                     | 101-105 | 517.2801  | 517.2803  | 0.4  | 1       |   |   | X | X | X |   |
| APKHKEMPFPKYPVEPFT        | 103-120 | 715.0393  | 715.0397  | 0.6  | 4 and 3 |   |   |   |   |   | X |
| LTD                       | 127-129 | 348.1761  | 348.1765  | 1.1  | 1       | X |   | X |   | X |   |
| TDV                       | 128-130 | 334.1603  | 334.1609  | 1.8  | 1       |   |   | X |   |   |   |
| DVENLHLPLP                | 129-138 | 573.8141  | 573.8113  | -4.9 | 2       | X | X | X |   | X |   |
| VENLHLPLP                 | 130-138 | 516.2982  | 516.2978  | -0.8 | 2       | X | X | X |   | X |   |
| NLHLPLPLLQS               | 132-142 | 622.8748  | 622.8717  | -5.0 | 2       | X |   |   |   |   |   |
| LHLPLP                    | 133-138 | 345.2207  | 345.2209  | 0.6  | 2       | X | X | X | X | X |   |
| LHLPLPLLQ                 | 133-141 | 522.3356  | 522.3342  | -2.7 | 2       | X |   |   |   |   |   |
| LHLPLPLLQS                | 133-142 | 565.8508  | 565.8502  | -1.1 | 2       | X |   |   |   |   |   |
| MHQPHQPLPPT               | 144-154 | 641.8222  | 641.8217  | -0.8 | 2 and 3 | X | X | X | X | X |   |
| MHQPHQPLPPTVMFPP          | 144-159 | 618.6448  | 618.6445  | -0.5 | 3       |   |   | X |   | X |   |
| MHQPHQPLPPTVmFPP          | 144-159 | 623.9769  | 623.9761  | -1.3 | 3       |   | X |   |   |   |   |
| HQPHQPLPPT                | 145-154 | 576.3020  | 576.3014  | -1.0 | 2       | X | X |   |   |   |   |
| HQPHQPLPPTVMFPP           | 145-159 | 574.9644  | 574.9643  | -0.2 | 3       |   |   |   | X |   |   |
| LPPT                      | 151-154 | 427.2534  | 427.2551  | 4.0  | 1       |   |   |   |   |   | X |
| TVm                       | 154-156 | 366.1694  | 366.1693  | -0.3 | 1       | X |   |   |   |   |   |
| SLSQSKVLPVP               | 164-174 | 577.8436  | 577.8426  | -1.7 | 2       |   |   | X |   | X |   |
| SLSQSKVLPVPQ              | 164-175 | 641.8722  | 641.8719  | -0.5 | 2       | X | X |   | X | X | X |
| SLSQSKVLPVPQKAVPYPQ       | 164-182 | 689.3940  | 689.3930  | -1.5 | 3       |   | X |   |   |   | X |
| SLSQSKVLPVPQKAVPYPQR      | 164-183 | 556.3224  | 556.3218  | -1.1 | 4       | X | X |   | X |   | X |
| SLSQSKVLPVPQKAVPYPQRDMPI  | 164-187 | 670.3743  | 670.3729  | -2.1 | 4       |   | X |   |   |   |   |
| SLSQSKVLPVPQKAVPYPQRDMPIQ | 164-188 | 936.1814  | 936.1810  | -0.4 | 3       |   |   |   |   |   | X |
| SQSKVLPVP                 | 166-174 | 954.5622  | 954.5619  | -0.3 | 1       |   |   | X |   | X |   |
| SQSKVLPVPQ                | 166-175 | 541.8137  | 541.8139  | 0.4  | 2       | X | X | X | X | X | X |

|                       |         |          |          |      |         |   |   |   |   |   |   |
|-----------------------|---------|----------|----------|------|---------|---|---|---|---|---|---|
| SQSKVLPVPQK           | 166-176 | 605.8611 | 605.8613 | 0.3  | 2       | X |   | X | X | X |   |
| SQSKVLPVPQKAVPYPQ     | 166-182 | 622.6869 | 622.6876 | 1.1  | 2 and 3 |   |   |   |   |   | X |
| SQSKVLPVPQKAVPYPQR    | 166-183 | 506.2928 | 506.2928 | 0.0  | 3 and 4 | X | X |   | X |   |   |
| SQSKVLPVPQKAVPYPQRDMP | 166-186 | 592.0749 | 592.0729 | -3.4 | 4       |   |   |   |   | X |   |
| SKVLPVP               | 168-174 | 739.4700 | 739.4713 | 1.8  | 1       |   |   | X |   |   |   |
| SKVLPVPQ              | 168-175 | 867.5309 | 867.5298 | -1.3 | 1       |   |   | X |   | X |   |
| SKVLPVPQK             | 168-176 | 498.3161 | 498.3160 | -0.2 | 2       |   |   |   |   | X |   |
| KVLPVP                | 169-174 | 652.4377 | 652.4392 | 2.3  | 1 and 2 |   |   | X |   | X |   |
| KVLPVPQ               | 169-175 | 780.4978 | 780.4978 | 0.0  | 1       | X |   | X |   | X |   |
| KAVPYP                | 176-181 | 674.3879 | 674.3872 | -1.0 | 1       | X |   |   |   |   |   |
| KAVPYPQ               | 176-182 | 802.4453 | 802.4458 | 0.6  | 1       | X | X | X | X | X |   |
| KAVPYPQR              | 176-183 | 479.7782 | 479.7771 | -2.3 | 2       | X | X | X | X | X |   |
| LYQEPVLGPVRGPF        | 192-206 | 834.9592 | 834.9590 | -0.2 | 2       |   |   |   |   | X |   |
| YQEPVLGPVR            | 193-202 | 579.3149 | 579.3139 | -1.7 | 2       | X |   | X | X | X |   |
| YQEPVLGPVRGPF         | 193-205 | 486.9296 | 486.9295 | -0.2 | 2       | X |   | X |   | X |   |
| YQEPVLGPVRGPF         | 193-206 | 778.4170 | 778.4170 | 0.0  | 2       | X | X |   | X | X |   |
| GPVRGPF               | 199-206 | 413.7315 | 413.7321 | 1.5  | 2       | X | X | X | X | X |   |
| GPVRGPFPI             | 199-207 | 470.2746 | 470.2742 | -0.9 | 2       |   | X |   |   | X |   |
| GPVRGPFPII            | 199-208 | 526.8174 | 526.8162 | -2.3 | 2       |   |   |   |   | X | X |
| IIV                   | 207-209 | 344.2546 | 344.2544 | -0.6 | 1       | X | X | X | X | X |   |

**Table S3.**  $\alpha$ S1-casein-derived peptides identified after whey fermentation by selected yeast strains. Details on strain isolation are in Table 2.

| Peptide sequence                                 | Fragment | $m/z$<br>observed | $m/z$<br>expected | pp<br>m | Charge | CA10<br>5 | CA11<br>6 | CA21<br>4 | LA20<br>2 | RO10<br>1 | RO204-<br>3 |
|--------------------------------------------------|----------|-------------------|-------------------|---------|--------|-----------|-----------|-----------|-----------|-----------|-------------|
| RPKHPIKH                                         | 1-8      | 338.2100          | 338.2103          | 0.9     | 3      |           |           | X         |           |           |             |
| RPKHPIKHQ                                        | 1-9      | 380.8963          | 380.8965          | 0.5     | 3      | X         |           | X         | X         |           | X           |
| RPKHPIKHQGLPQEV                                  | 1-15     | 441.7562          | 441.7561          | -0.2    | 4      |           | X         |           |           |           |             |
| RPKHPIKHQGLPQEV                                  | 1-16     | 470.0269          | 470.0272          | 0.6     | 5      |           |           |           |           |           | X           |
| LLR                                              | 20-22    | 401.2866          | 401.2871          | 1.2     | 1      |           |           | X         | X         | X         |             |
| LSKDIGsEsTEDQ                                    | 40-52    | 784.7913          | 784.7919          | 0.8     | 2      |           |           |           |           | X         |             |
| SKDIGsEsTE                                       | 41-50    | 606.7067          | 606.7071          | 0.7     | 2      |           |           | X         | X         |           |             |
| sKDIGsEsTE                                       | 41-50    | 646.6900          | 646.6902          | 0.3     | 2      |           |           |           | X         |           |             |
| SKDIGsEsTED                                      | 41-51    | 664.2193          | 664.2206          | 2.0     | 2      |           |           | X         |           | X         |             |
| SKDIGsEsTED                                      | 41-51    | 664.2195          | 664.2206          | 1.7     | 2      |           |           |           |           |           |             |
| SKDIGsEsTEDQ                                     | 41-52    | 728.2496          | 728.2498          | 0.3     | 2      | X         | X         | X         | X         | X         |             |
| sKDIGsEsTEDQ                                     | 41-52    | 768.2322          | 768.2330          | 1.0     | 2      |           |           |           |           |           |             |
| SKDIGsEsTEDQA                                    | 41-53    | 763.7695          | 763.7684          | -1.4    | 2      | X         | X         | X         | X         | X         |             |
| IGsEsTEDQ                                        | 44-52    | 563.1722          | 563.1729          | 1.2     | 2      |           |           |           | X         |           |             |
| DQAMEDIKQ                                        | 51-59    | 539.2471          | 539.2477          | 1.1     | 2      |           |           |           |           | X         |             |
| DIK                                              | 56-58    | 375.2233          | 375.2238          | 1.3     | 1      |           |           |           |           | X         | X           |
| sVEQKHIQ                                         | 75-82    | 524.7439          | 524.7448          | 1.7     | 2      | X         |           | X         |           | X         |             |
| sVEQKHIQK                                        | 75-83    | 588.7920          | 588.7923          | 0.5     | 2      |           | X         |           |           |           |             |
| HIQ                                              | 80-82    | 397.2186          | 397.2194          | 2.0     | 1      |           |           | X         |           | X         | X           |
| LRLKKYKVPQ                                       | 99-108   | 424.9426          | 424.9432          | 1.4     | 3      | X         | X         |           | X         |           | X           |
| LRLKKYKVPQL                                      | 99-109   | 347.2304          | 347.2302          | -0.6    | 4      |           | X         |           | X         |           | X           |
| LRLKKYKVPQLEIVPN                                 | 99-114   | 646.7342          | 646.7348          | 0.9     | 4      |           | X         |           | X         |           | X           |
| LRLKKYKVPQLEIVPNsAEERLH                          | 99-122   | 568.9167          | 568.9167          | 0.0     | 5      |           |           |           |           |           | X           |
| LRLKKYKVPQLEIVPNsAEERLHSMKEGIHAQ                 | 99-130   | 637.8435          | 637.8435          | 0.0     | 6      |           |           |           |           |           | X           |
| LRLKKYKVPQLEIVPNsAEERLHSMKEGIHAQQKEPMIG<br>VNQEL | 99-142   | 742.1083          | 742.1086          | 0.4     | 7      |           |           |           |           |           | X           |

|                    |         |          |          |      | 2 and |   |   |   |   |   |   |   |
|--------------------|---------|----------|----------|------|-------|---|---|---|---|---|---|---|
| RLKKYKVPQ          | 100-108 | 387.2484 | 387.2485 | 0.3  | 3     | X | X |   | X | X |   |   |
| RLKKYKVPQL         | 100-109 | 318.9603 | 318.9592 | -3.4 | 4     |   |   |   | X |   |   |   |
| KKYKVPQ            | 102-108 | 445.7763 | 445.7765 | 0.4  | 2     | X | X | X |   |   | X |   |
| KKYKVPQLEIVPN      | 102-114 | 389.7360 | 389.7356 | -1.0 | 4     |   |   |   |   |   |   | X |
| LEIVPN             | 109-114 | 684.3916 | 684.3927 | 1.6  | 1     |   |   |   | X | X | X |   |
| KEGIHAQQK          | 124-132 | 519.7874 | 519.7882 | 1.5  | 2     | X | X |   |   |   | X |   |
| sAEER              | 115-119 | 336.1229 | 336.1234 | 1.5  | 2     |   |   | X |   |   |   |   |
| PMI                | 134-136 | 360.1935 | 360.1952 | 4.7  | 1     |   |   |   |   |   |   | X |
| PEL                | 147-149 | 358.1959 | 358.1973 | 3.9  | 1     |   |   |   |   |   |   | X |
| YYV                | 165-167 | 444.2135 | 444.2129 | -1.4 | 1     |   |   | X | X |   |   |   |
| APSFSDIPNPIGSEN    | 176-190 | 772.8647 | 772.8650 | 0.4  | 2     |   |   | X |   |   |   |   |
| APSFSDIPNPIGSENSEK | 176-193 | 944.9503 | 944.9498 | -0.5 | 2     |   |   | X |   |   | X |   |
| SFSDIPNPIGSENSE    | 178-192 | 796.8569 | 796.8574 | 0.6  | 2     |   |   | X |   |   |   |   |
| FSDIPNPIG          | 179-187 | 480.2458 | 480.2453 | -1.0 | 2     | X |   | X |   |   |   | X |
| FSDIPNPIGSE        | 179-189 | 588.2843 | 588.2826 | -2.9 | 2     |   | X |   | X |   |   |   |
| FSDIPNPIGSENSE     | 179-192 | 753.3406 | 753.3414 | 1.1  | 2     | X | X |   | X | X | X |   |
| FSDIPNPIGSENSEK    | 179-193 | 817.3906 | 817.3888 | -2.2 | 2     |   | X |   |   |   |   | X |
| SDIPNPIGSENSE      | 180-192 | 679.8064 | 679.8072 | 1.2  | 2     |   |   |   | X |   |   |   |
| SDIPNPIGSENSEK     | 180-193 | 743.8548 | 743.8546 | -0.3 | 2     |   |   |   |   |   |   | X |
| IPNPIGSEN          | 182-190 | 470.7412 | 470.7404 | -1.7 | 2     | X |   |   |   |   |   |   |
| IPNPIGSENSE        | 182-192 | 578.7783 | 578.7777 | -1.0 | 2     | X |   |   | X |   |   |   |



**Table S4.**  $\alpha$ S2-casein-derived peptides identified after whey fermentation by selected yeast strains. Details on strain isolation are in Table 2.

| Peptide sequence                 | Fragment | <i>m/z</i> observed | <i>m/z</i> expected | ppm  | Charge     | CA105 | CA116 | CA214 | LA202 | RO101 | RO204-3 |
|----------------------------------|----------|---------------------|---------------------|------|------------|-------|-------|-------|-------|-------|---------|
| SIIsQETYSK                       | 13-21    | 574.7645            | 574.7654            | 1.6  | 2          |       |       | X     |       |       |         |
| AINPsKENL                        | 27-35    | 533.2531            | 533.2524            | -1.3 | 2          |       |       | X     |       |       |         |
| YSI                              | 52-54    | 382.1975            | 382.1973            | -0.5 | 1          |       |       |       |       |       | X       |
| YLYQGPIVLNPWDQVKR                | 98-114   | 697.0474            | 697.0458            | -2.3 | 3          |       | X     | X     |       | X     |         |
| LYQGPIVLNPWDQVKR                 | 99-114   | 963.5336            | 963.5334            | -0.2 | 2, 3 and 4 | X     | X     | X     | X     | X     | X       |
| YQGPIVLNPWDQVK                   | 100-113  | 828.9404            | 828.9408            | 0.5  | 2          | X     |       |       |       | X     |         |
| YQGPIVLNPWDQVKR                  | 100-114  | 906.9917            | 906.9914            | -0.3 | 2 and 3    | X     | X     | X     | X     | X     | X       |
| QGPIVLNPWDQVK                    | 101-113  | 747.4103            | 747.4092            | -1.5 | 2          |       |       |       |       |       |         |
| QGPIVLNPWDQVKR                   | 101-114  | 550.6424            | 550.6423            | -0.2 | 3          |       |       | X     | X     |       |         |
| RNAVPIPT                         | 114-122  | 484.7813            | 484.7798            | -3.1 | 2          |       | X     |       |       |       |         |
| NAVPIPTLNR                       | 115-125  | 598.3433            | 598.3433            | 0.0  | 2          | X     | X     | X     | X     | X     |         |
| NAVPIPTLNRE                      | 115-126  | 662.8637            | 662.8646            | 1.4  | 2          | X     | X     | X     | X     | X     |         |
| NAVPIPTLNREQLSTsEENSKKTVDMESTEVF |          |                     |                     |      |            |       |       |       |       |       |         |
| TKKTKLTEEEKNRLNF                 | 115-163  | 842.9743            | 842.9755            | 1.4  | 7          |       |       |       |       |       |         |
| AVPIPTLNR                        | 116-125  | 541.3234            | 541.3218            | -3.0 | 2          | X     |       | X     | X     | X     |         |
| AVPIPTLNRE                       | 116-126  | 605.8429            | 605.8431            | 0.3  | 2          |       |       | X     |       |       |         |
| PITP                             | 118-121  | 427.2534            | 427.2551            | 4.0  | 1          |       |       |       |       |       | X       |
| NREQLsTsEE                       | 124-133  | 676.7419            | 676.7420            | 0.1  | 2          |       |       | X     |       |       |         |
| YLK                              | 179-181  | 423.2607            | 423.2602            | -1.2 | 1          | X     | X     | X     |       | X     | X       |
| TKVIPYVR                         | 198-205  | 325.8712            | 325.8710            | -0.6 | 3          | X     | X     |       |       |       |         |
| YVRY                             | 203-206  | 600.3153            | 600.3140            | -2.2 | 1          |       |       |       | X     |       |         |

**Table S5.**  $\kappa$ -casein-derived peptides identified after whey fermentation by selected yeast strains. Details on strain isolation are in Table 2.

| Peptide sequence                          | Fragment | m/z observed | m/z expected | ppm  | Charge  | CA105 | CA116 | CA214 | LA202 | RO101 | RO204-3 |
|-------------------------------------------|----------|--------------|--------------|------|---------|-------|-------|-------|-------|-------|---------|
| KYIPQYVL                                  | 30-38    | 568.8385     | 568.8393     | 1.4  | 2       |       |       |       |       |       | X       |
| YGL                                       | 44-46    | 718.2449     | 718.2432     | -2.4 | 2       | X     |       |       |       | X     |         |
| PVALINN                                   | 53-59    | 740.4292     | 740.4301     | 1.2  | 1       |       |       | X     |       | X     |         |
| FLPYPPYAKPA                               | 61-71    | 665.3473     | 665.3475     | 0.3  | 2       |       |       |       |       | X     |         |
| AVRSPA                                    | 72-77    | 300.6766     | 300.6768     | 0.7  | 2       |       |       | X     |       | X     |         |
| AVRSPAQ                                   | 72-78    | 364.7059     | 364.7061     | 0.5  | 2       |       |       | X     |       |       |         |
| AVRSPAQI                                  | 72-79    | 421.2485     | 421.2482     | -0.7 | 2       | X     |       | X     | X     | X     |         |
| AVRSPAQIL                                 | 72-80    | 477.7898     | 477.7902     | 0.8  | 2       |       |       |       | X     |       |         |
| SNTVPAK                                   | 86-92    | 358.7003     | 358.7005     | 0.6  | 2       |       |       | X     |       |       |         |
| MAIPPKKNQ                                 | 112-120  | 342.8637     | 342.8637     | 0.0  | 2 and 3 | X     | X     | X     | X     | X     | X       |
| MAIPPKKNQD                                | 112-121  | 571.3056     | 571.3053     | -0.5 | 2 and 3 | X     | X     | X     | X     | X     | X       |
| MAIPPKKNQDK                               | 112-122  | 635.3530     | 635.3528     | -0.3 | 2 and 3 | X     | X     | X     | X     | X     | X       |
| AIPPKKNQDK                                | 113-122  | 569.8315     | 569.8326     | 1.9  | 2       |       | X     |       |       | X     |         |
| PPKKNQDK                                  | 115-122  | 477.7714     | 477.7720     | 1.3  | 2       | X     | X     | X     |       | X     |         |
| DKTEIPTINT                                | 121-130  | 566.2986     | 566.2982     | -0.7 | 2       | X     |       | X     |       | X     | X       |
| KTEIPTIN                                  | 122-129  | 915.5132     | 915.5146     | 1.5  | 1       |       |       | X     |       | X     |         |
| TEI                                       | 123-125  | 362.1917     | 362.1922     | 1.4  | 1       |       |       | X     |       |       |         |
| TEIPTIN                                   | 123-129  | 787.4177     | 787.4196     | 2.4  | 1       | X     |       |       |       | X     |         |
| TIASGE                                    | 130-135  | 577.2818     | 577.2828     | 1.7  | 1       |       |       | X     |       |       |         |
| TIA <sub>s</sub> GEPT                     | 130-137  | 855.3493     | 855.3496     | 0.4  | 1       | X     | X     |       | X     | X     | X       |
| TIA <sub>s</sub> GEPTSTPT                 | 130-141  | 1241.5314    | 1241.5297    | -1.4 | 1       |       | X     |       | X     | X     |         |
| TIASGEPTSTPTTE                            | 130-143  | 1391.6528    | 1391.6536    | 0.6  | 1       |       |       |       |       | X     |         |
| TIA <sub>s</sub> GEPTSTPTTE               | 130-143  | 736.3129     | 736.3136     | 1.0  | 2       |       |       |       |       | X     |         |
| TIASGEPTSTPTTEAVESTVATLED <sub>s</sub> PE | 130-157  | 967.4340     | 967.4322     | -1.9 | 3       |       |       |       |       | X     |         |
| GEPTSTPTTE                                | 134-143  | 1019.4517    | 1019.4528    | 1.1  | 1       |       |       | X     | X     |       |         |
| STPTTE                                    | 138-143  | 635.2872     | 635.2883     | 1.7  | 1       |       |       |       | X     | X     |         |
| AVESTVAtL                                 | 144-152  | 970.4490     | 970.4493     | 0.3  | 1       |       |       |       |       | X     |         |
| AVESTVATLED <sub>s</sub> P                | 144-156  | 699.8041     | 699.8054     | 1.9  | 2       |       |       |       |       | X     |         |

|                |         |           |           |      |         |   |   |   |   |   |
|----------------|---------|-----------|-----------|------|---------|---|---|---|---|---|
| AVESTVATLEDsPE | 144-157 | 1527.6467 | 1527.6462 | -0.3 | 1       |   |   |   |   | X |
| AVESTVATLEDsPE | 144-157 | 764.3280  | 764.3267  | -1.7 | 2       |   |   |   |   | X |
| AVESTVATLEDsPE | 144-157 | 804.3109  | 804.3099  | -1.2 | 2       |   |   |   |   | X |
| VESTVAtL       | 145-152 | 450.2102  | 450.2097  | -1.1 | 2       |   |   | X |   | X |
| VESTVATLEDsPE  | 145-157 | 728.8079  | 728.8082  | 0.4  | 2       |   |   |   |   | X |
| STVATLEDsP     | 147-156 | 550.2322  | 550.2314  | -1.5 | 2       |   |   |   |   | X |
| STVATLEDsPE    | 147-157 | 614.7537  | 614.7527  | -1.6 | 3       | X |   | X | X | X |
| STVAtLEDsPE    | 147-157 | 654.7380  | 654.7358  | -3.4 | 2       | X |   | X | X | X |
| TVATLEDsPE     | 148-157 | 571.2373  | 571.2367  | -1.1 | 2       |   |   | X |   | X |
| VATLEDsPE      | 149-157 | 1040.4160 | 1040.4184 | 2.3  | 1 and 2 |   |   | X |   | X |
| TLEDsPE        | 151-157 | 870.3108  | 870.3128  | 2.3  | 1       |   |   | X |   | X |
| sPEVIESPP      | 155-163 | 1034.4446 | 1034.4442 | -0.4 | 1       |   |   |   |   | X |
| sPEVIESPPEI    | 155-165 | 638.7897  | 638.7891  | -0.9 | 2       |   |   |   |   | X |
| VIESPPEIN      | 158-166 | 499.2644  | 499.2637  | -1.4 | 2       |   | X | X | X |   |
| SPPEIN         | 161-166 | 328.6655  | 328.6661  | 1.8  | 2       |   |   | X |   | X |
| SPPEINT        | 161-167 | 757.3737  | 757.3727  | -1.3 | 1       | X |   | X | X |   |
| PEI            | 163-175 | 358.1959  | 358.1973  | 3.9  | 1       |   |   |   |   | X |

**Table S6.**  $\alpha$ -lactalbumin-derived peptides identified after whey fermentation by selected yeast strains. Details on strain isolation are in Table 2.

| Peptide sequence | Fragment | m/z observed | m/z expected | ppm  | Charge  | CA105 | CA116 | CA214 | LA202 | RO101 | RO204-3 |
|------------------|----------|--------------|--------------|------|---------|-------|-------|-------|-------|-------|---------|
| LTK              | 7-9      | 361.2440     | 361.2445     | 1.4  | 1       |       |       | X     |       | X     |         |
| TKCEVFR          | 8-14     | 441.7285     | 441.7287     | 0.5  | 2       |       |       |       | X     |       |         |
| RELKDLKGYGGVSLPE | 14-29    | 587.6575     | 587.6562     | -2.2 | 3 and 4 |       | X     |       |       |       | X       |
| ELKDLKGYGG       | 15-24    | 540.2909     | 540.2902     | -1.3 | 2       |       |       |       |       | X     |         |
| ELKDLKGYGGVSLPE  | 15-29    | 802.9291     | 802.9301     | 1.2  | 2 and 3 | X     | X     |       |       |       |         |
| KDLKGY           | 17-22    | 362.2047     | 362.2054     | 1.9  | 2       | X     |       |       |       |       |         |
| KDLKGYGGVS       | 17-26    | 512.2777     | 512.2771     | -1.2 | 2       | X     | X     | X     | X     | X     |         |
| KDLKGYGGVSL      | 17-27    | 379.5489     | 379.5485     | -1.1 | 3       | X     |       |       |       |       |         |
| KDLKGYGGVSLP     | 17-28    | 411.9002     | 411.8994     | -1.9 | 2 and 3 | X     | X     | X     | X     | X     |         |
| KDLKGYGGVSLPE    | 17-29    | 454.9143     | 454.9136     | -1.5 | 2 and 3 | X     | X     | X     | X     | X     | X       |
| DLK              | 18-20    | 375.2233     | 375.2238     | 1.3  | 1       |       |       |       |       | X     | X       |
| DLKGYGG          | 18-24    | 355.1796     | 355.1794     | -0.6 | 2       | X     |       |       | X     | X     |         |
| DLKGYGGVSLP      | 18-28    | 553.3002     | 553.2980     | -4.0 | 2       | X     | X     | X     | X     | X     |         |
| DLKGYGGVSLPE     | 18-29    | 617.8192     | 617.8193     | 0.2  | 2       | X     | X     | X     | X     | X     | X       |
| KGYGGVS          | 20-26    | 667.3404     | 667.3410     | 0.9  | 1       | X     |       | X     |       | X     |         |
| KGYGGVSLPE       | 20-29    | 503.7634     | 503.7639     | 0.9  | 2       | X     | X     |       | X     |       |         |
| FHTSGYDT         | 35-42    | 464.1959     | 464.1958     | -0.2 | 2       | X     |       |       |       |       |         |
| FHTSGYDTQ        | 35-43    | 528.2257     | 528.2251     | -1.1 | 2       |       | X     | X     | X     | X     |         |
| IVQNNDSTEYGL     | 45-56    | 676.8218     | 676.8201     | -2.5 | 2       |       |       |       |       |       | X       |
| YGL              | 54-56    | 352.1875     | 352.1867     | -2.3 | 1       | X     |       |       |       | X     |         |
| LDD              | 85-87    | 362.1551     | 362.1558     | 1.9  | 1       | X     | X     |       | X     |       | X       |
| LTD              | 89-91    | 348.1761     | 348.1765     | 1.1  | 1       | X     |       | X     |       | X     |         |
| KKIL             | 97-100   | 501.3756     | 501.3759     | 0.6  | 1       |       | X     |       |       |       |         |
| ILD              | 99-101   | 360.2131     | 360.2129     | -0.6 | 1       | X     | X     | X     | X     | X     | X       |
| LDK              | 100-102  | 375.2240     | 375.2238     | -0.5 | 1       | X     |       |       | X     | X     | X       |
| DKVGINY          | 101-107  | 808.4184     | 808.4199     | 1.9  | 1       |       |       | X     |       | X     |         |
| DKVGINYW         | 101-108  | 497.7530     | 497.7533     | 0.6  | 2       |       |       |       | X     |       |         |
| KVGINYW          | 102-108  | 440.2388     | 440.2398     | 2.3  | 2       |       |       | X     | X     |       |         |
| VGINYWLAHKA      | 103-113  | 424.5687     | 424.5680     | -1.6 | 3       |       | X     |       |       |       |         |

|      |         |          |          |     |   |  |  |   |   |  |   |
|------|---------|----------|----------|-----|---|--|--|---|---|--|---|
| LAH  | 109-111 | 340.1972 | 340.1979 | 2.1 | 1 |  |  | X | X |  |   |
| KLDQ | 118-121 | 503.2803 | 503.2824 | 4.2 | 1 |  |  |   |   |  | X |

**Table S7.**  $\beta$ -lactoglobulin-derived peptides identified after whey fermentation by selected yeast strains. Details on strain isolation are in Table 2.

| Peptide sequence     | Fragment | <i>m/z</i> observed | <i>m/z</i> expected | ppm  | Charge  | CA105 | CA116 | CA214 | LA202 | RO101 | RO204-3 |
|----------------------|----------|---------------------|---------------------|------|---------|-------|-------|-------|-------|-------|---------|
| LIV                  | 2-4      | 344.2546            | 344.2544            | -0.6 | 1       | X     | X     | X     | X     | X     |         |
| LIVTQ                | 2-6      | 573.3606            | 573.3606            | 0.0  | 1       | X     |       |       |       |       |         |
| LIVTQTMK             | 2-9      | 933.5435            | 933.5438            | 0.3  | 1 and 2 | X     | X     | X     | X     | X     | X       |
| LIVTQTMKG            | 2-10     | 495.7869            | 495.7863            | -1.2 | 2       | X     | X     | X     |       |       |         |
| LIVTQTMKGL           | 2-11     | 552.3286            | 552.3283            | -0.5 | 2       | X     | X     | X     | X     | X     |         |
| LIVTQTMKGLD          | 2-12     | 609.8426            | 609.8418            | -1.3 | 2       | X     |       | X     | X     | X     |         |
| LIVTQTMKGLDIQ        | 2-14     | 730.4143            | 730.4131            | -1.6 | 2       |       | X     |       |       | X     |         |
| LIVTQTMKGLDIQK       | 2-15     | 794.4595            | 794.4606            | 1.4  | 2 and 3 |       |       |       |       |       | X       |
| LIVTQTmKGLDIQKVAGTW  | 2-20     | 706.7270            | 706.7258            | -1.7 | 3       | X     | X     |       |       |       | X       |
| KGL                  | 9-11     | 317.2185            | 317.2183            | -0.6 | 1       | X     | X     | X     | X     | X     |         |
| KGLDIQKVAGTW         | 9-20     | 439.2506            | 439.2505            | -0.2 | 3       |       | X     |       |       |       |         |
| LDI                  | 11-13    | 360.2128            | 360.2129            | 0.3  | 1       |       |       |       |       | X     |         |
| YSL                  | 21-23    | 382.1975            | 382.1973            | -0.5 | 1       |       |       |       |       |       | X       |
| AMAASDISL            | 24-32    | 439.7176            | 439.7180            | 0.9  | 2       |       |       |       |       |       | X       |
| AmAASDISLLDAQSAPLRVY | 24-43    | 703.3625            | 703.3613            | -1.7 | 3       |       |       |       |       |       | X       |
| SDISLLDAQSAPLRV      | 28-42    | 792.9347            | 792.9332            | -1.9 | 2       |       |       |       |       |       | X       |
| SDISLLDAQSAPLRVY     | 28-43    | 874.4660            | 874.4649            | -1.3 | 2 and 3 |       |       |       |       |       | X       |
| ISLL                 | 30-33    | 445.3024            | 445.3021            | -0.7 | 1       |       |       |       |       | X     |         |
| ISLLDAQSAPLRV        | 30-42    | 691.9055            | 691.9037            | -2.6 | 2       |       |       |       |       |       | X       |
| ISLLDAQSAPLRVY       | 30-43    | 773.4354            | 773.4354            | 0.0  | 2       |       |       |       |       |       | X       |
| LLDAQSAPLRVY         | 32-43    | 673.3780            | 673.3774            | -0.9 | 2       |       |       |       |       |       | X       |
| LDAQSAPLRVY          | 33-43    | 616.8360            | 616.8353            | -1.1 | 2       |       | X     |       |       |       | X       |
| LDAQSAPLRVYVE        | 33-45    | 730.8909            | 730.8908            | -0.1 | 2       |       |       |       |       |       | X       |
| DAQSAPLRV            | 34-42    | 478.7625            | 478.7616            | -1.9 | 2       |       | X     |       |       | X     | X       |
| DAQSAPLRVYVE         | 34-45    | 674.3496            | 674.3488            | -1.2 | 2       | X     | X     |       | X     | X     |         |
| AQSAPLR              | 35-41    | 371.7136            | 371.7139            | 0.8  | 2       | X     |       |       |       |       |         |

|                     |         |          |          |      |         |   |   |   |   |   |   |
|---------------------|---------|----------|----------|------|---------|---|---|---|---|---|---|
| AQSAPLRV            | 35-42   | 421.2496 | 421.2482 | -3.3 | 2       | X |   |   |   | X |   |
| AQSAPLRVY           | 35-42   | 502.7804 | 502.7798 | -1.2 | 2       | X | X |   | X |   | X |
| AQSAPLRVYVE         | 35-44   | 616.8373 | 616.8353 | -3.2 | 2       | X | X | X | X | X | X |
| YVEELKPTPE          | 42-52   | 602.8094 | 602.8084 | -1.7 | 2       |   |   |   |   | X |   |
| YVEELKPTPEGDLEIL    | 42-58   | 922.9819 | 922.9800 | -2.1 | 2       |   |   |   |   |   | X |
| VEELKPTPE           | 44-52   | 521.2761 | 521.2768 | 1.3  | 2       | X | X |   | X |   |   |
| VEELKPTPEGDLEIL     | 44-58   | 841.4501 | 841.4484 | -2.0 | 2 and 3 |   |   |   |   |   | X |
| KPT                 | 47-49   | 345.2129 | 345.2132 | 0.9  | 1       |   |   |   |   |   |   |
| KKII                | 70-73   | 501.3756 | 501.3759 | 0.6  | 1       |   | X |   |   |   |   |
| IAE                 | 73-75   | 332.1808 | 332.1816 | 2.4  | 1       |   |   | X |   |   |   |
| KTKIPAVFK           | 76-84   | 516.3357 | 516.3342 | -2.9 | 2 and 3 | X | X | X | X | X | X |
| KTKIPAVFKI          | 76-85   | 382.2538 | 382.2533 | -1.3 | 3       | X | X |   |   |   |   |
| KTKIPAVFKID         | 76-86   | 420.5964 | 420.5956 | -1.9 | 3       | X | X | X | X | X |   |
| AVF                 | 81-83   | 336.1923 | 336.1918 | -1.5 | 1       |   | X |   |   |   | X |
| IDALNENK            | 85-92   | 458.7397 | 458.7404 | 1.5  | 2       |   |   |   |   |   |   |
| VLVL                | 93-96   | 443.3233 | 443.3228 | -1.1 | 1       |   |   | X | X | X |   |
| VLVLDTDYK           | 93-101  | 533.2955 | 533.2950 | -0.9 | 2       |   |   | X |   | X |   |
| LVR                 | 123-125 | 387.2711 | 387.2714 | 0.8  | 1       |   |   |   | X |   |   |
| VDDEALEKF           | 129-137 | 533.2599 | 533.2586 | -2.4 | 2       | X |   | X |   |   |   |
| EALEKFDKALKALPMHIRL | 132-150 | 445.4613 | 445.4595 | -4.0 | 5       |   |   |   |   |   | X |
| DKALKALPMHIRL       | 138-150 | 377.2297 | 377.2301 | 1.1  | 4       |   |   |   |   |   | X |
| ALKALP              | 140-145 | 306.7073 | 306.7076 | 1.0  | 2       |   |   | X |   | X |   |
| ALKALPMHIRL         | 140-150 | 316.4497 | 316.4496 | -0.3 | 3 and 4 | X | X | X | X | X |   |
| KALPMHIR            | 142-149 | 322.5289 | 322.5286 | -0.9 | 3       | X |   |   |   |   |   |
| KALPMHIRL           | 142-150 | 539.8311 | 539.8313 | 0.4  | 2 and 3 | X | X | X | X | X |   |
| PMHIRLS             | 145-151 | 427.2397 | 427.2393 | -0.9 | 2       | X |   | X |   |   |   |
| HIRLSFNPT           | 147-155 | 542.7983 | 542.7985 | 0.4  | 2       | X | X | X | X | X |   |
